# Supplementary material for: Structure, morphology and photocatalytic performance of europium-doped bismuth vanadate
Source: Royal Society of Chemistry journal article supplement (doi:10.1039/d1qi01623g), 2022-01-01
Supplement: d1qi01623g1.pdf [file d1qi01623g1.pdf]

## **Structure, morphology and photocatalytic performance of europium doped bismuth vanadate**

Wen Zhang, Han Zhang, Wei Huang<sup>a</sup>, Xiaoyu Lu, Shengnan Gao, Jun Wang,  
Dongliang Zhang, Xiaowei Zhang, Mitang Wang\*

School of Materials and chemistry, University of Shanghai for Science and  
Technology, Shanghai 200093, China.

E-mail: [btwmt@126.com](mailto:btwmt@126.com)

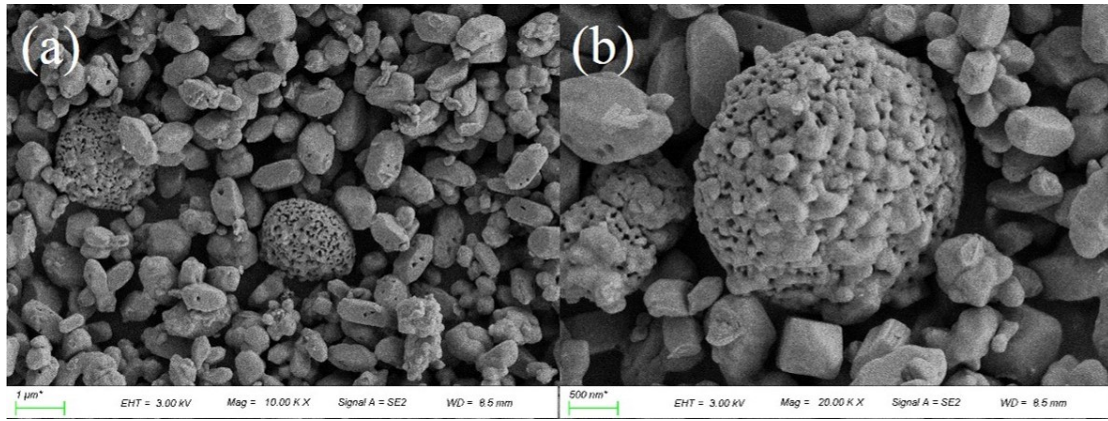

**Fig. S1.** The scanning electron microscope image of EBVO-7(a), (b) is an enlarged image of (a).

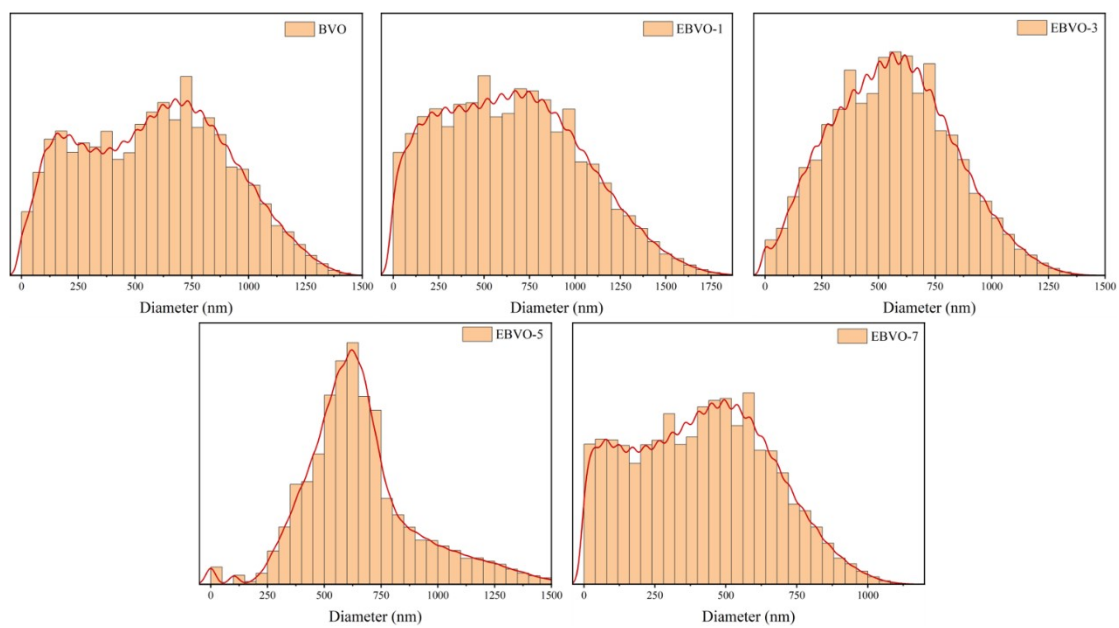

**Fig. S2.** The particle aerodynamic diameter spectra of the as-synthesized sample.
